# Supplementary material for: PRMT5 regulates ovarian follicle development by facilitating Wt1 translation
Source: eLife. 2021 Aug 27;10:e68930. doi: 10.7554/eLife.68930 (PMC8483736; doi:10.7554/eLife.68930)
Supplement: Figure 1—figure supplement 1—source data 1. — Loss of Prmt5 in granulosa cells caused aberrant follicle development and female infertility. [file elife-68930-fig1-figsupp1-data1.xlsx]

## Sheet: Figure 1—figure supplement 3
	1month	2months	3months	4months
control 1	0	7	12	8
control 2	8	12	9	11
control 3	10	9	9	7
control 4	10	11	0	9
Prmt5flox/flox;Sf1-cre 1	0	0	0	0
Prmt5flox/flox;Sf1-cre 2	0	0	0	0
Prmt5flox/flox;Sf1-cre 3	0	0	0	0
Prmt5flox/flox;Sf1-cre 4	0	0	0	0

## Sheet: Figure 1—figure supplement 4
2W						P value
PRF	Control	1814	1240	2021		0.979705
	Prmt5flox/flox;Sf1-cre	1564	1230	2250
PF	Control	217	326	252		0.856138
	Prmt5flox/flox;Sf1-cre	232	204	330
SF	Control	112	130	154		0.452823
	Prmt5flox/flox;Sf1-cre	116	127	119
3W
PRF	Control	1453	1219	1359		0.914501
	Prmt5flox/flox;Sf1-cre	1208	1549	1316
PF	Control	385	462	562		0.494359
	Prmt5flox/flox;Sf1-cre	373	300	538
SF	Control	153	138	131		0.0309259
	Prmt5flox/flox;Sf1-cre	187	191	231
AF	Control	111	111	127		0.000400449
	Prmt5flox/flox;Sf1-cre	5	9	0
4W
PRF	Control	922	1404	897		0.944021
	Prmt5flox/flox;Sf1-cre	1152	1243	873
PF	Control	488	507	263		0.882211
	Prmt5flox/flox;Sf1-cre	371	417	430
SF	Control	145	132	160		0.0658254
	Prmt5flox/flox;Sf1-cre	168	164	188
AF	Control	84	95	109		0.00415376
	Prmt5flox/flox;Sf1-cre	6	0	3
5W
PRF	Control	810	1459	918		0.355748
	Prmt5flox/flox;Sf1-cre	750	868	852
PF	Control	538	665	545		0.212553
	Prmt5flox/flox;Sf1-cre	589	433	359
SF	Control	184	181	116		0.0449115
	Prmt5flox/flox;Sf1-cre	80	68	58
AF	Control	72	69	85		0.00347467
	Prmt5flox/flox;Sf1-cre	3	1	0
