# Supplementary material for: PRMT5 regulates ovarian follicle development by facilitating Wt1 translation
Source: eLife. 2021 Aug 27;10:e68930. doi: 10.7554/eLife.68930 (PMC8483736; doi:10.7554/eLife.68930)
Supplement: Figure 4—source data 1. — Differentially expressed genes in Prmt5-deficient granulosa cells. [file elife-68930-fig4-data1.xlsx]

## Sheet: Figure. 4B
Prmt5					P value
Control	1	1.11426	0.910852		0.0042948
Prmt5flox/flox;Sf1-cre	0.139404	0.149305	0.130595
MEP50
Control	1.14363	1.05847	1		0.000164726
Prmt5flox/flox;Sf1-cre	0.176744	0.303561	0.159505
WT1
Control	0.936072	1	1.17764		0.0034619
Prmt5flox/flox;Sf1-cre	0.451213	0.366494	0.312174
FOXL2
Control	1	0.759259	1.13716		0.0640277
Prmt5flox/flox;Sf1-cre	0.638562	0.583454	0.525885
CYP11A1
Control	0.465116	0.2905	0.457332		0.0195765
Prmt5flox/flox;Sf1-cre	0.830815	0.993225	1.23478
StAR
Control	0.322581	0.413499	0.217517		0.0135787
Prmt5flox/flox;Sf1-cre	0.880407	1.24006	0.908983
NR5A1
Control	0.43634	0.358423	0.262937		0.00131123
Prmt5flox/flox;Sf1-cre	0.977594	0.969587	1.05422

## Sheet: Figure. 4C
Prmt5							P value
Control	1	0.952638	0.716978	0.858565	1.22264		0.000136823
Prmt5flox/flox;Sf1-cre	0.115824	0.184284	0.129408	0.376312	0.0987552
Wt1
Control	1	0.993092	0.707107	1.2138	0.8956		0.12469
Prmt5flox/flox;Sf1-cre	0.687771	0.946058	1.15669	1.22005	0.96653
Foxl2
Control	1	0.932878	0.726986	1.03526	1.08673		0.054349
Prmt5flox/flox;Sf1-cre	0.45376	0.812252	0.913831	0.806642	0.619854
Hsd3b1
Control	1	0.817902	0.895025	1.59107	1.27456		0.0198169
Prmt5flox/flox;Sf1-cre	2.54912	2.65737	1.60214	1.41421	1.82766
Cyp11a1
Control	1	1.1487	1.38511	1.47427	0.806642		0.0202217
Prmt5flox/flox;Sf1-cre	9.06307	8.33882	3.78423	4.28709	3.18215
Cyp17a1
Control	1	1.05702	0.707107	1.05479	1.47427		0.0781607
Prmt5flox/flox;Sf1-cre	3.4822	1.79005	1.54723	1.08673	2.14355
StAR
Control	1	1.02101	0.80107	1.11729	0.959264		0.00593426
Prmt5flox/flox;Sf1-cre	2.94854	3.4822	4.31691	4.62675	6.72717
Nr5a1
Control	1	0.82932	0.870551	0.784584	0.899		0.0130384
Prmt5flox/flox;Sf1-cre	1.41421	1.22869	2.3274	1.95884	1.5699
Cyp19a1
Control	1	0.682154	1.45257	0.834863	1.70214		0.0114599
Prmt5flox/flox;Sf1-cre	2.9028	1.67769	1.79005	1.86607	2.60793

## Sheet: Figure. 4E
WT1					P value
Control	0.87723	1	1.1771		0.0110615
EPZ015666	0.354764	0.309507	0.278098
FOXL2
Control	1.00888	1	0.723018		0.0576046
EPZ015666	0.561046	0.551478	0.520725
CYP11A1
Control	0.36904	0.456621	0.64921		0.0297776
EPZ015666	0.767524	1.08457	1.15795
StAR
Control	0.394403	0.430147	0.640249		0.00145802
EPZ015666	1.26	1.20843	1.41614
NR5A1
Control	0.541503	0.405386	0.410261		0.0108868
EPZ015666	1.02792	1	0.780569

## Sheet: Figure. 4F
Prmt5					P value
Control	1	0.82932	0.668964		0.33606
EPZ015666	0.757858	1.23114	1.07177
Wt1
Control	1	0.933033	0.697372		0.188652
EPZ015666	0.870551	1.33793	1.27456
Foxl2
Control	1	1.47427	0.714057		0.534036
EPZ015666	1.05252	0.737135	0.886981
Hsd3b1
Control	1	1.07923	0.959264		0.00751555
EPZ015666	1.36604	1.47427	1.59107
Cyp11a1
Control	0.939523	0.895536	1.33793		0.0137897
EPZ015666	2.22123	1.6783	1.94135
StAR
Control	1	0.732043	0.876606		0.0134095
EPZ015666	1.58008	1.84718	2.14214
NR5A1
Control	1	1.00696	0.812252		0.0191624
EPZ015666	1.73713	1.61328	2.14076
