# Supplementary material for: PRMT5 regulates ovarian follicle development by facilitating Wt1 translation
Source: eLife. 2021 Aug 27;10:e68930. doi: 10.7554/eLife.68930 (PMC8483736; doi:10.7554/eLife.68930)
Supplement: Figure 5—figure supplement 1—source data 1. — The increased luciferase activity of pRWT1F was not due to a monocistronic Firefly open reading frame generated by cryptic splicing or promoter within the dicistronic gene. [file elife-68930-fig5-figsupp1-data1.xlsx]

## Sheet: Figure 5—figure supplement 1B
pRF	1	0.976	1.209		P Value
pRWT1F	1.02	0.943	1.195		0.935838

## Sheet: Figure 5—figure supplement 1C
Control	0.15714	0.165491	0.128817	0.140482		P Value
Prmt5flox/flox;Sf1-cre	0.0709712	0.0519117	0.0632697	0.0410444		0.000170133
