# Supplementary material for: PRMT5 regulates ovarian follicle development by facilitating Wt1 translation
Source: eLife. 2021 Aug 27;10:e68930. doi: 10.7554/eLife.68930 (PMC8483736; doi:10.7554/eLife.68930)
Supplement: Figure 5—source data 1. — PRMT5 regulated translation of Wt1 mRNA by inducing internal ribosome entry site (IRES) activity in the 5′UTR. [file elife-68930-fig5-data1.xlsx]

## Sheet: Figure. 5B
								P Value
group A	pRF	0.0144121	0.0157666	0.0129468	0.0110461		A-B	0.0029
group B	pRWT1F	0.16565	0.132733	0.120669	0.1478		A-C	0.5961
group C	pRWT1-RevF	0.0158001	0.0136737	0.0172928	0.0168466		A-D	0.0014
group D	pRCCND1F	0.124114	0.135262	0.141415	0.155117

## Sheet: Figure. 5C
								P Value
group A	pRF	0.0130008	0.0130942	0.0130125	0.0136602
group B	pRWT1F -268- -158	0.0319646	0.0417689	0.0320863	0.0511699		A-B	0.0107812
group C	pRWT1F -198- -58	0.00775939	0.0184255	0.0108187	0.00830115		A-C	0.503492
group D	pRWT1F -105- 1	0.0166627	0.0201723	0.0174135	0.0217891		A-D	0.0156609
group E	pRWT1F -268- 1	0.123664	0.151537	0.171661	0.145962		A-E	0.000842908

## Sheet: Figure. 5D
						P Value
pRWT1F	0.16565	0.132733	0.120669	0.1478
pRWT1F+EPZ015666	0.0764026	0.0517011	0.0855023	0.0717011		0.00150296
pRCCND1F	0.124114	0.135262	0.141415	0.155117
pRCCND1F+EPZ015666	0.111088	0.129519	0.0866575	0.0873762		0.0334666
