# Supplementary material for: PRMT5 regulates ovarian follicle development by facilitating Wt1 translation
Source: eLife. 2021 Aug 27;10:e68930. doi: 10.7554/eLife.68930 (PMC8483736; doi:10.7554/eLife.68930)
Supplement: Figure 6—figure supplement 1—source data 1. — Quantitative analysis of HnRNPA1 and WT1 protein expression in granulosa cells after HnRNPA1 siRNA transfection or EPZ015666 treatment. [file elife-68930-fig6-figsupp1-data1.xlsx]

## Sheet: Figure 6—figure supplement 1
WT1							P value
group A	Control	1	1.31547	1.05955
group B	HnRNPA1 siRNA	1.70304	2.48453	2.0915		A-B	0.049
group C	EPZ015666	0.470512	0.612309	0.438231		A-C	0.0164
group D	HnRNPA1 siRNA+ EPZ015666	0.718198	1.17184	1.15472		A-D	0.7683
HnRNPA1
group A	Control	1	1.22205	0.867324
group B	HnRNPA1 siRNA	0.291897	0.233385	0.265474		A-B	0.042
group C	EPZ015666	1.04926	0.989549	1.25478		A-C	0.9589
group D	HnRNPA1 siRNA+ EPZ015666	0.151027	0.25809	0.269081		A-D	0.0337
