# Supplementary material for: PRMT5 regulates ovarian follicle development by facilitating Wt1 translation
Source: eLife. 2021 Aug 27;10:e68930. doi: 10.7554/eLife.68930 (PMC8483736; doi:10.7554/eLife.68930)
Supplement: Figure 6—source data 1. — Wt1 internal ribosome entry site (IRES) activity is regulated by PRMT5 via methylation of HnRNPA1. [file elife-68930-fig6-data1.xlsx]

## Sheet: Figure. 6B
								P Value
group A	pRF	0.00973701	0.0119779	0.00894677	0.0102247		A-B	0.0002
group B	pRWT1F	0.235405	0.246382	0.216275	0.19887		B-C	0.0079
group C	pRWT1F+HnRNPA1 siRNA	0.358765	0.327645	0.388364	0.36821		B-D	0.02
group D	EPZ+pRWT1F	0.176443	0.170991	0.1822	0.16983		D-E	0.0003
group E	EPZ+pRWT1F+HnRNPA1 siRNA	0.248895	0.253007	0.264348	0.26335

## Sheet: Figure. 6D
								P Value
group A	pRWT1F	0.265047	0.207486	0.251379	0.2339		A-B	0.0013
group B	pRWT1F+HnRNPA1	0.193218	0.154187	0.178889	0.1801		A-C	0.0086
group C	pRWT1F +Mutant	0.110235	0.140905	0.118211	0.12365		A-D	0.0005
group D	EPZ015666+pRWT1F +HnRNPA1	0.111633	0.0850487	0.0873418	0.0796		A-E	0.0002
group E	EPZ015666+pRWT1F +Mutant	0.0872451	0.0652346	0.098959	0.0773		B-C	0.0352
							D-E	0.3697

## Sheet: Figure. 6E
					P Value
IgG	0.0085606	0.0120266	0.00385762		0.0215283
HnRNP A1	5.24858	3.37135	3.52083

## Sheet: Figure. 6J
						P Value
group A	Ad-con	0.074	0.034	0.004		A-B	0.047
group B	Ad-HnRNPA1	5.12	2.33	3.35		A-C	0.0317
group C	Ad-Hn mutant	5.21	2.82	3.51		B-C	0.1835
