# Supplementary material for: PRMT5 regulates ovarian follicle development by facilitating Wt1 translation
Source: eLife. 2021 Aug 27;10:e68930. doi: 10.7554/eLife.68930 (PMC8483736; doi:10.7554/eLife.68930)
Supplement: Figure 7—source data 1. — The upregulation of steroidogenic genes in Prmt5flox/flox;Sf1+/cre granulosa cells was reversed by Wt1 overexpression. [file elife-68930-fig7-data1.xlsx]

## Sheet: Figure. 7C
	Prmt5						P Value
group A	control	1	0.852623	1.03526		A-B	0.0059
group B	Prmt5flox/flox;Sf1-cre	0.108067	0.151774	0.140632		A-C	0.0046
group C	Prmt5flox/flox;Sf1-cre+Ad-WT1	0.116629	0.132127	0.137738		B-C	0.6268
	Wt1
group A	control	1	0.846745	1.16473		A-B	0.3208
group B	Prmt5flox/flox;Sf1-cre	1.68859	1.2974	1.01049		A-C	0.0047
group C	Prmt5flox/flox;Sf1-cre+Ad-WT1	81.5719	96.1625	77.3434		B-C	0.0046
	Fshr
group A	control	1	0.817902	1.12506		A-B	0.022
group B	Prmt5flox/flox;Sf1-cre	2.08493	1.64718	2.53208		A-C	0.0501
group C	Prmt5flox/flox;Sf1-cre+Ad-WT1	0.400535	0.554785	0.726986		B-C	0.0202
	Cyp11a1
group A	control	1	0.986233	1.21419		A-B	0.0118
group B	Prmt5flox/flox;Sf1-cre	3.77769	4.91853	4.20528		A-C	0.198
group C	Prmt5flox/flox;Sf1-cre+Ad-WT1	0.976319	0.810506	0.846176		B-C	0.012
	Nr5a1
group A	control	1	0.852635	1.00099		A-B	0.0244
group B	Prmt5flox/flox;Sf1-cre	2.32874	1.71474	1.83426		A-C	0.0065
group C	Prmt5flox/flox;Sf1-cre+Ad-WT1	0.641351	0.429283	0.525335		B-C	0.0082
	Star
group A	control	1	0.817902	1.12506		A-B	0.0124
group B	Prmt5flox/flox;Sf1-cre	3.6822	4.72817	4.89056		A-C	0.0001
group C	Prmt5flox/flox;Sf1-cre+Ad-WT1	2.04202	1.87905	2.21162		B-C	0.0241

## Sheet: Figure. 7E
	PRMT5						P Value
group A	control	1.19757	1	1.28686		A-B	0.0137
group B	Prmt5flox/flox;Sf1-cre	0.230057	0.256965	0.158351		A-C	0.0146
group C	Prmt5flox/flox;Sf1-cre+Ad-WT1	0.136712	0.283317	0.219607		B-C	0.9711
	WT1
group A	control	0.947056	1	1.11083		A-B	0.0177
group B	Prmt5flox/flox;Sf1-cre	0.408068	0.54357	0.393612		A-C	0.0076
group C	Prmt5flox/flox;Sf1-cre+Ad-WT1	4.71644	5.5256	4.4716		B-C	0.0037
	CYP11A1
group A	control	0.4813	0.402637	0.377671		A-B	0.0209
group B	Prmt5flox/flox;Sf1-cre	0.887406	1	1.06413		A-C	0.9619
group C	Prmt5flox/flox;Sf1-cre+Ad-WT1	0.507384	0.337718	0.421976		B-C	0.0252
	StAR
group A	control	0.234728	0.450363	0.209432		A-B	0.0192
group B	Prmt5flox/flox;Sf1-cre	0.874467	1	1.08343		A-C	0.2246
group C	Prmt5flox/flox;Sf1-cre+Ad-WT1	0.500424	0.432448	0.406824		B-C	0.0259
	NR5A1
group A	control	0.487563	0.437548	0.433763		A-B	0.0477
group B	Prmt5flox/flox;Sf1-cre	0.889523	1	1.30906		A-C	0.8566
group C	Prmt5flox/flox;Sf1-cre+Ad-WT1	0.363593	0.437086	0.612131		B-C	0.0075
